# Supplementary material for: Computational measurement of tumor immune microenvironment in gastric adenocarcinomas
Source: PubMed Central journal article supplement (PMC6141531; doi:10.1038/s41598-018-32299-0), 2018-09-17

## Supplementary Figures and Information

### Computational measurement of tumor immune microenvironment in gastric adenocarcinomas

Young Hwan Chang<sup>1\*</sup>, You Jeong Heo<sup>2\*</sup>, Junhun Cho<sup>3\*</sup>, Sang Yong Song<sup>3</sup>, Jeeyun Lee<sup>4</sup> and Kyoung-Mee Kim<sup>3</sup>

<sup>1</sup>Department of Biomedical Engineering and Computational Biology Program, Oregon Health and Science University (OHSU), Portland, OR 97239 USA

<sup>2</sup>The Samsung Advanced Institute for Health Sciences & Technology (SAIHST), Samsung Medical Center, Sungkyunkwan University School of Medicine, Seoul, Korea

<sup>3</sup>Department of Pathology & Translational Genomics, Samsung Medical Center, Sungkyunkwan University School of Medicine, Seoul, Korea

<sup>4</sup>Division of Hematology-Oncology, Department of Medicine, Samsung Medical Center, Sungkyunkwan University School of Medicine, Seoul, Korea

**Figure S1.** Kaplan-Meier survival analyses of PD-L1 ratio, EBV+, MSI-H, and tumor microenvironment subtypes: A) Overall survival analysis and B) Disease-free survival analysis.

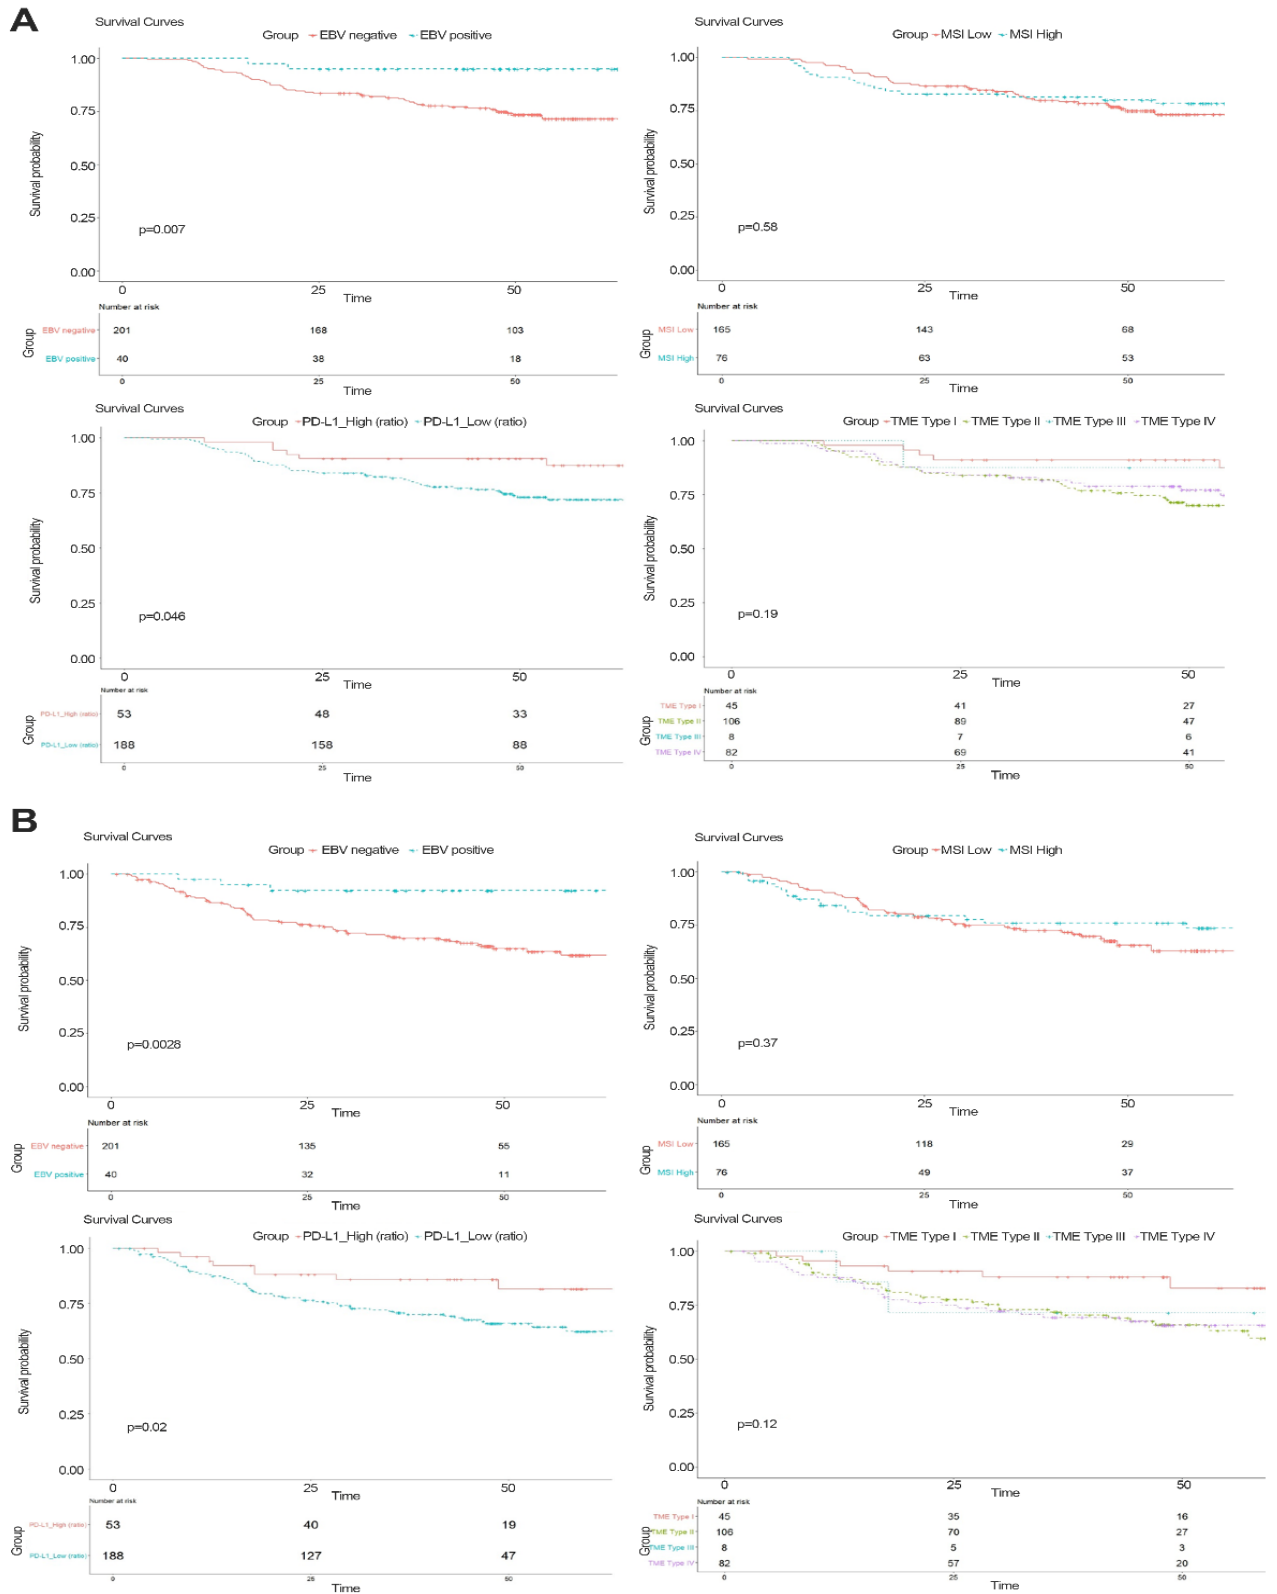

Supplement: 41598_2018_32299_MOESM1_ESM.pdf [file 41598_2018_32299_MOESM1_ESM.pdf]
